# Supplementary material for: High performance floating self-excited sliding triboelectric nanogenerator for micro mechanical energy harvesting
Source: PubMed Central journal article supplement (PMC8333367; doi:10.1038/s41467-021-25047-y), 2021-08-03
Supplement: 41467_2021_25047_MOESM1_ESM.pdf [file 41467_2021_25047_MOESM1_ESM.pdf]

Supplementary Information for

**High performance floating self-excited sliding triboelectric nanogenerator for  
micro mechanical energy harvesting**

*Long et al.*

**Supplementary Fig. 1:** The photograph of the VMC.

**Supplementary Fig. 2:** Initial charge without charge self-excitation.

**Supplementary Fig. 3:** Schematic diagram of the slider with two pairs of excitation electrodes reaching a stable state.

**Supplementary Fig. 4:** The output performance of different pairs of electrodes for slider with charge self-excitation.

**Supplementary Fig. 5:** Initial charge of different pairs of electrodes for TENG without charge self-excitation.

**Supplementary Fig. 6:** Charge output increment of the electrode with different electrode length-width with charge self-excitation under air gap is 1 mm.

**Supplementary Fig. 7:** Initial charge of the electrode with different electrode areas and air gaps without charge self-excitation.

**Supplementary Fig. 8:** Dynamic output charge of one electrode FSS-TENG.

**Supplementary Fig. 9:** Dynamic output charge of FSS-TENG with different materials (FEP, PTFE and Kapton) in 0.35 mm air gap.

**Supplementary Fig. 10:** The excitation voltage of FSS-TENG under different capacitors.

**Supplementary Fig. 11:** The surface charge density of FSS-TENG under different temperature **a** and humidity **b**.

**Supplementary Fig. 12:** The surface charge density of FSS-TENG under the simulated solar light.

**Supplementary Fig. 13:** Structure and performance of floating TENG (F-TENG).

**Supplementary Fig. 14:** Voltage curves of capacitors charging by F-TENG at 300 rpm.

**Supplementary Fig. 15:** Stability test of F-TENG.

**Supplementary Fig. 16:** The output charge curves for the first hour and the last hour.

**Supplementary Fig. 17:** SEM images of unused film.

**Supplementary Fig. 18:** Device abrasion photographs of the stator of S-TENG after 100 thousand times cycles.

  

**Supplementary Table 1:** The comparison of charge density with the reported works.

**Supplementary Table 2:** The rotational speed of the rotator at different wind speeds.

  

**Supplementary Movie 1:** Demonstration of the dynamic process of charge self-

excitation driven by wind.

**Supplementary Movie 2:** Demonstration of 912 LEDs lit by the FSS-TENG at  $5 \text{ m s}^{-1}$  wind speed.

**Supplementary Movie 3:** Demonstration of the simulated road warning lights driven by the FSS-TENG at  $5 \text{ m s}^{-1}$  wind speed.

**Supplementary Movie 4:** Demonstration of two temperature hygrometers in parallel driven by the FSS-TENG at  $3 \text{ m s}^{-1}$  wind speed.

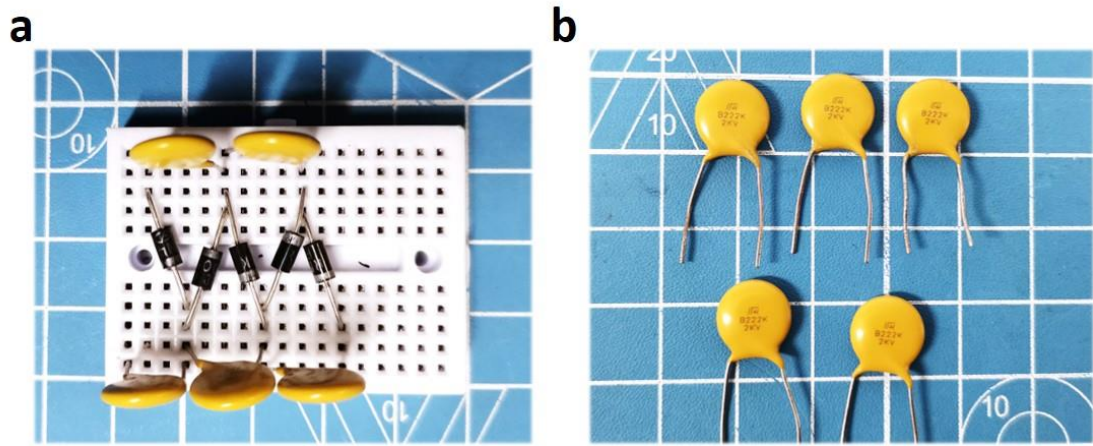

**Supplementary Fig. 1 The photograph of the VMC. a** The connecting circuit of VMC. **b** Ceramic capacitor.

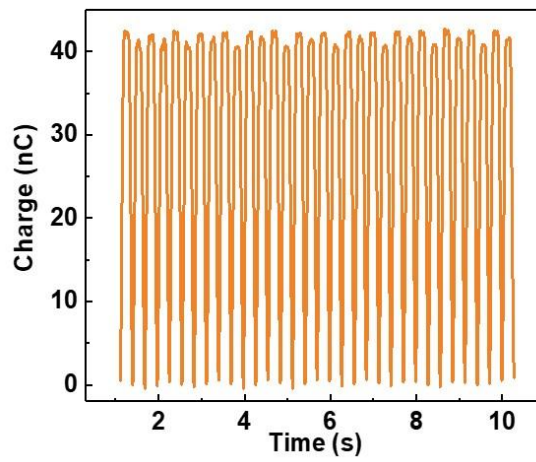

**Supplementary Fig. 2 Initial charge without charge self-excitation.**

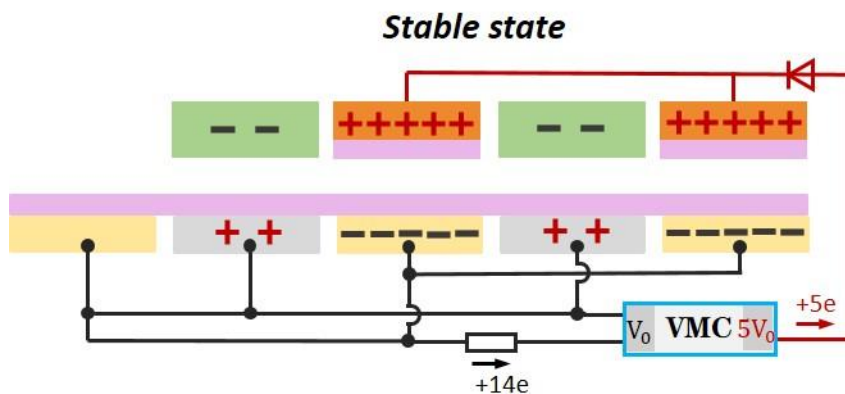

**Supplementary Fig. 3** The schematic diagram of the slider with two pairs of excitation electrodes reaching a stable state.

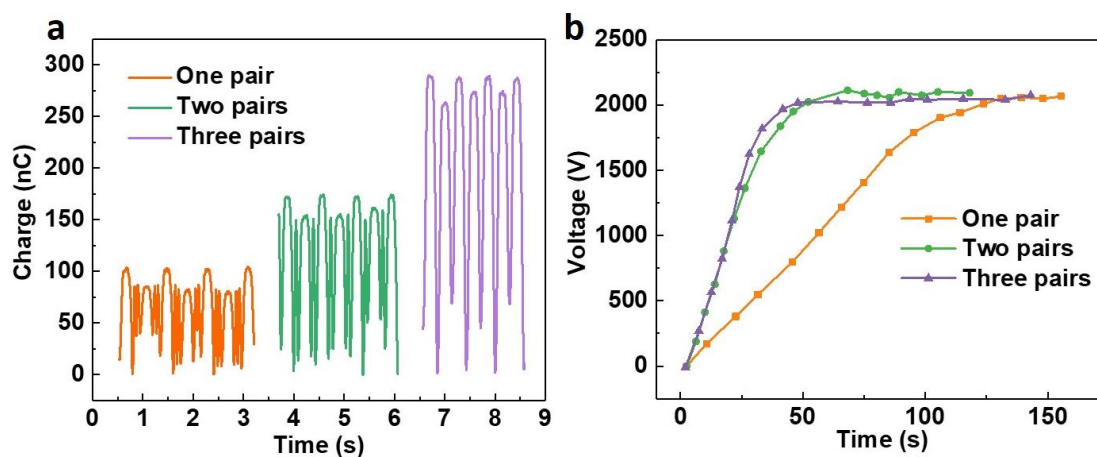

**Supplementary Fig. 4** The output performance of different pairs of sliders (**a** PTFE and an electrode in one pair) with charge self-excitation. **a** The transferred charges and **(b)** excitation voltage.

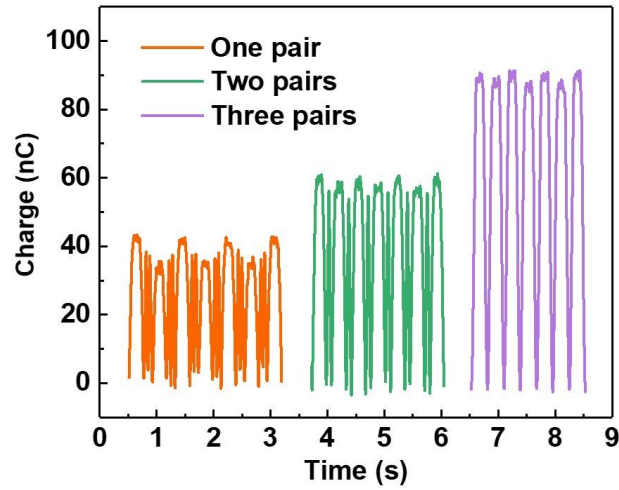

**Supplementary Fig. 5 Initial charge of different pairs of sliders for the TENG without charge self-excitation.**

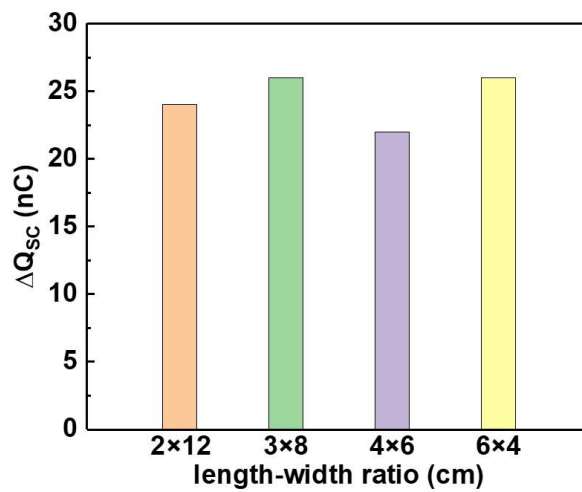

**Supplementary Fig. 6 Charge output increment of the electrode with different electrode length-width ratio with charge self-excitation under air gap is 1 mm. The surface of the stator electrode is coated with Kapton film, and the slider electrode is none.**

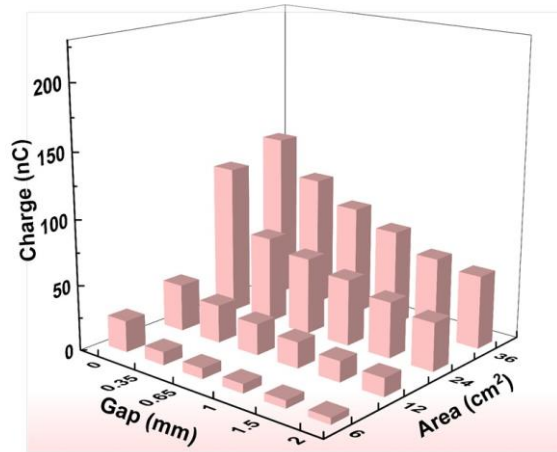

**Supplementary Fig. 7 Initial charge of the electrode with different electrode areas and air gaps without charge self-excitation.** The surface of the stator electrode is coated with Kapton film, and no film is for the slider electrode.

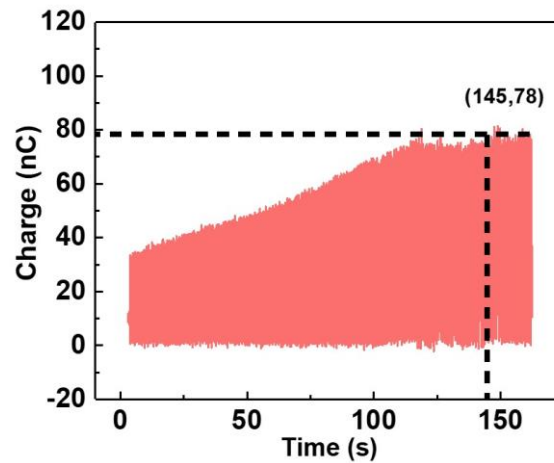

**Supplementary Fig. 8 Dynamic output charge of one electrode FSS-TENG.** No dielectric film is attached to the Cu electrode of the slider, and a 25 $\mu$ m Kapton film is attached to the Al electrode on the stator.

# Slider

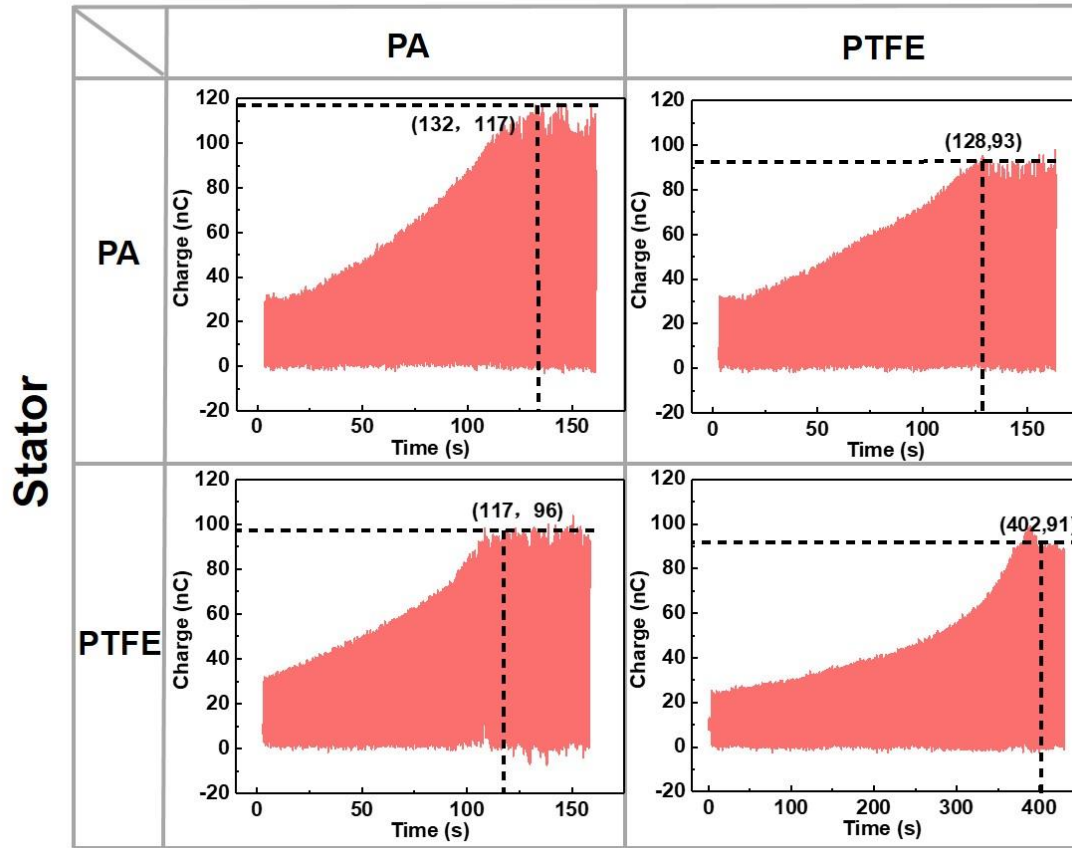

Supplementary Fig. 9 Dynamic output charge of FSS-TENG with different materials (FEP/ PTFE / Kapton) in 0.35 mm air gap.



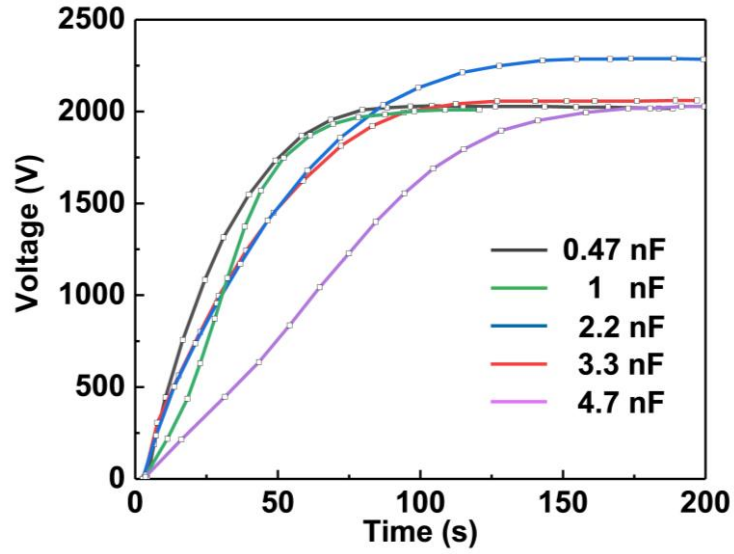

Supplementary Fig. 10 The excitation voltage of FSS-TENG under different capacitors.

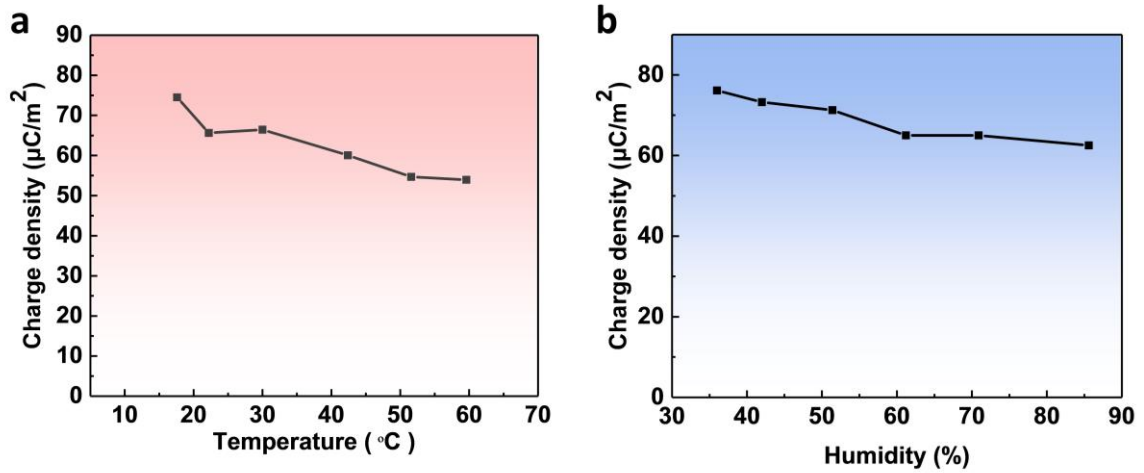

Supplementary Fig. 11 The surface charge density of FSS-TENG under different temperature (a) and humidity (b). a The test humidity is controlled at around 40%. b The test temperature is controlled at around 20 °C.

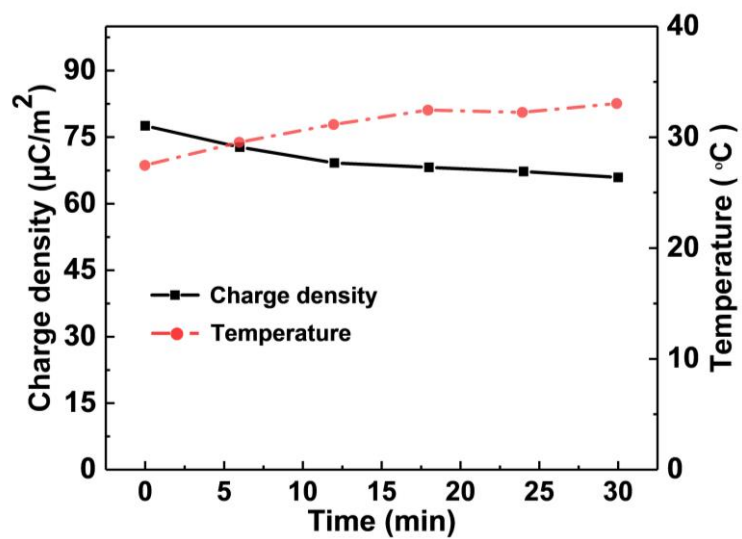

**Supplementary Fig. 12** The surface charge density of FSS-TENG under the **simulated solar light**. The standard light intensity is 100 mW/cm<sup>2</sup>. The test humidity is controlled at around 50%.

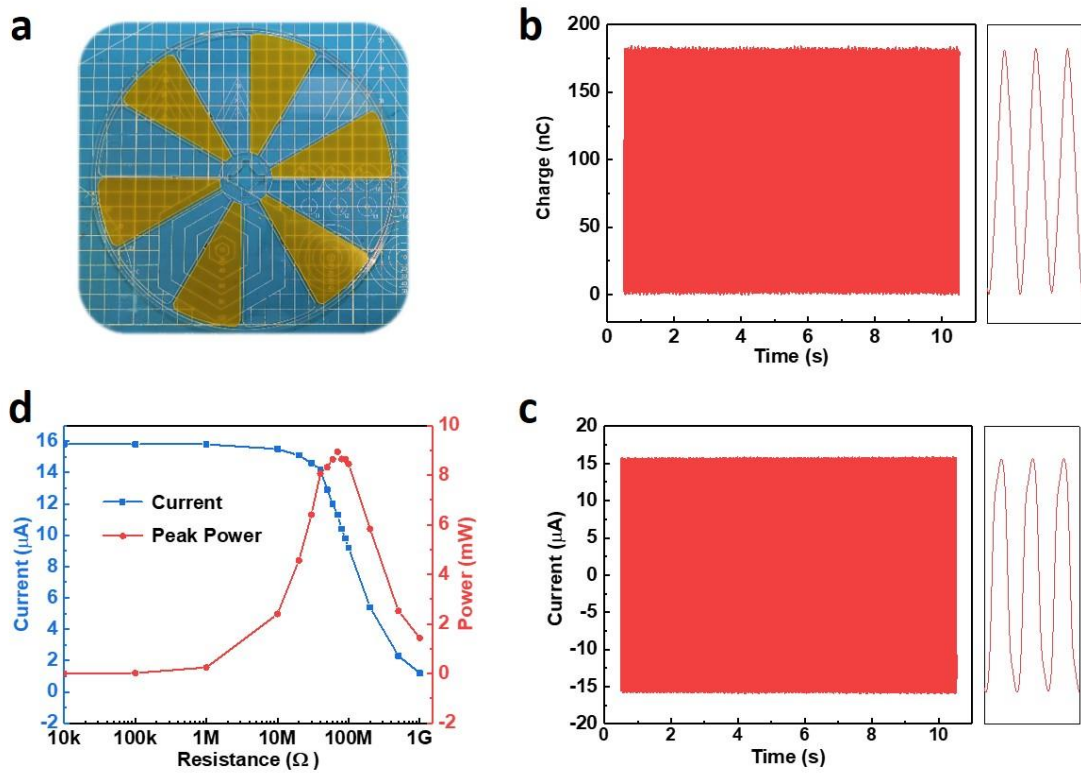

**Supplementary Fig. 13 Structure and performance of floating TENG (F-TENG).** **a** Device photographs of the rotator. The stator is the same as FSS-TENG. **b** Transferred charge and **(c)** current curves of the F-TENG at 300 rpm, respectively. The right side of the figure is the enlarged output curve. **d** Matching impedance and output power of F-TENG at 300 rpm.

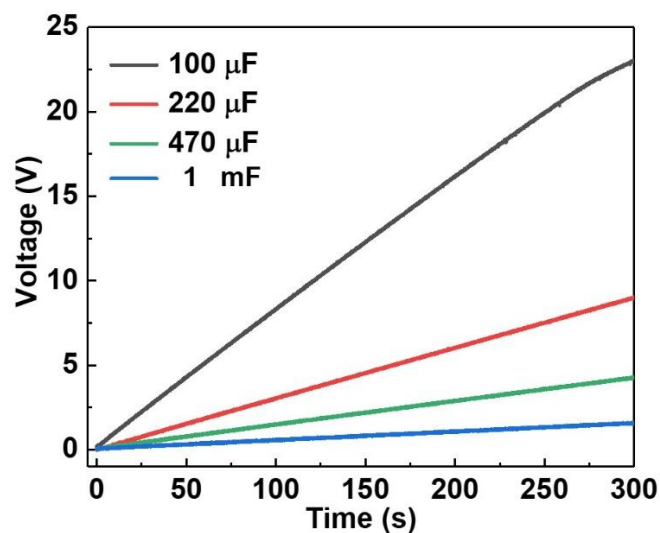

**Supplementary Fig. 14** Voltage curves of capacitors charging by F-TENG at 300 rpm.

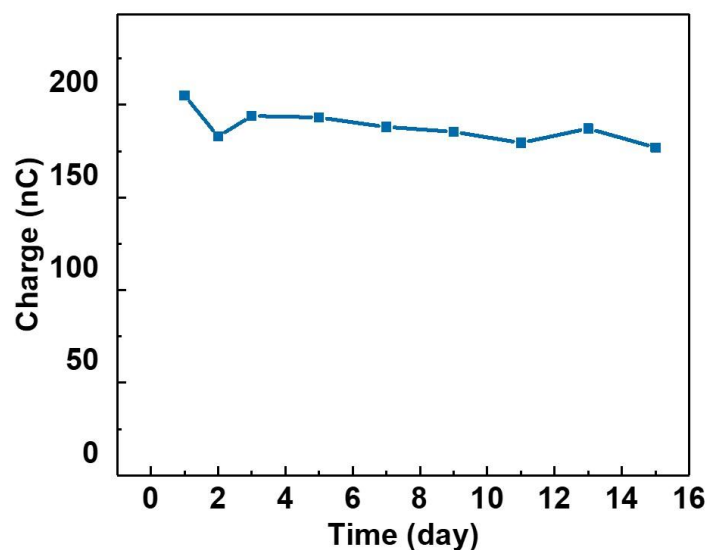

**Supplementary Fig. 15** Stability test of F-TENG. We tested the induced output charge of F-TENG intermittently of 15 days. And the ambient humidity is controlled at 40% to 50%.

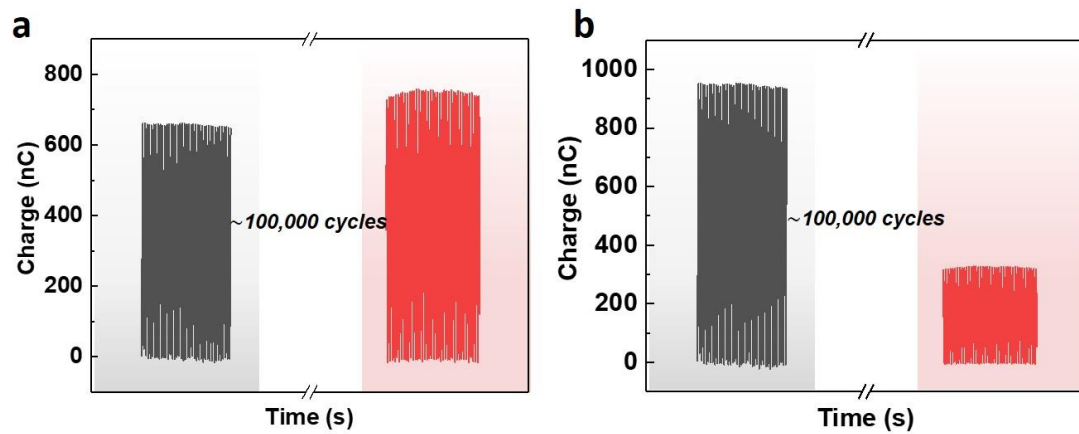

**Supplementary Fig. 16** The output charge curves for the first hour and the last hour. **a** The stability of FSS-TENG. **b** The stability of S-TENG.

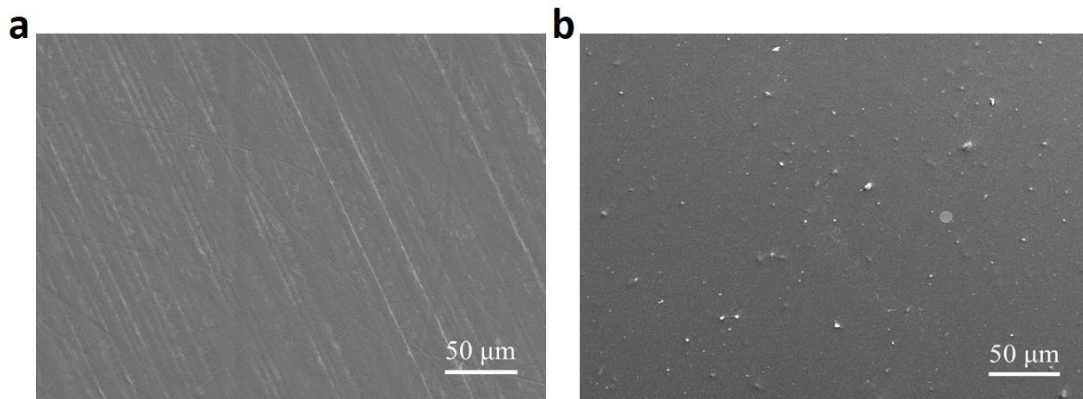

**Supplementary Fig. 17 SEM images of unused film. a PTFE and b PA.**

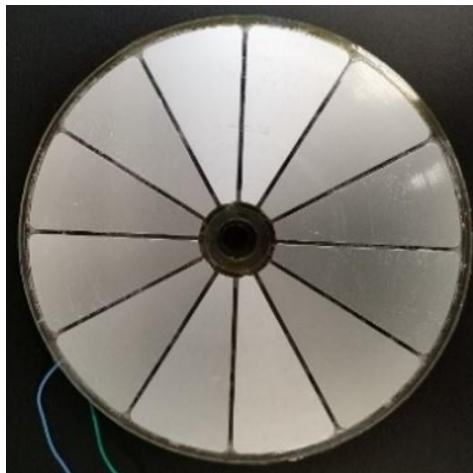

**Supplementary Fig. 18 Device abrasion photographs of stator of S-TENG after 100 thousand times cycles.**

**Supplementary Table 1. The comparison of charge density with the reported works.**

| <b>Boosting output charge of non-contact TENG</b> |                |                                 |                                                             |                                               |
|---------------------------------------------------|----------------|---------------------------------|-------------------------------------------------------------|-----------------------------------------------|
| <b>Charge supplementary</b>                       | <b>Gap(mm)</b> | <b><math>Q_{sc}</math> (nC)</b> | <b><math>\sigma_{sc}</math> (<math>\mu C m^{-2}</math>)</b> | <b>Related work</b>                           |
| no                                                | a certain      | 46                              | 7.7                                                         | Appl. Phys. Rev. 7, 021401 (2020)             |
| no                                                | 5              | no                              | 25                                                          | Adv. Mater.2014, 26, 2818–2824                |
| no                                                | 0.5            | no                              | 12.2                                                        | Adv. Mater. 2014, 26, 6599–6607               |
| no                                                | 1              | 6.9                             | 1.6                                                         | Nano Res. 13,1903–1907(2020)                  |
| no                                                | 0.5            | no                              | 20                                                          | ACS Appl. Mater. Interfaces 2014,6, 3031–3038 |
| PTFE stripes                                      | 1.5            | 256                             | 16.3                                                        | Adv. Energy Mater. 2020, 10, 2000064          |
| Rabbit hair brushes                               | < 3            | 135                             | > 20.3                                                      | Nano Energy 81 (2021) 105625                  |
| PTFE stripes                                      | 1              | 182                             | 18.9                                                        | Nano Energy 64 (2019) 103908                  |
| <b>Charge Self-excitation</b>                     | <b>0.35</b>    | <b>1000</b>                     | <b>71.5</b>                                                 | <b>This work</b>                              |

**Supplementary Table 2. The rotational speed of the rotator at different wind speeds.**

| <b>Wind speed<br/>(m s<sup>-1</sup>)</b> | 3     | 4     | 5     | 6      | 6.5    | 7      |
|------------------------------------------|-------|-------|-------|--------|--------|--------|
| <b>rotational speed<br/>(rpm)</b>        | 19.74 | 71.43 | 99.24 | 117.18 | 131.78 | 139.34 |

At different wind speeds, the rotator speed is obtained by calculating the cycle number of measured transfer charge per second.
